# Supplementary material for: The distribution shifts of Pinus armandii and its response to temperature and precipitation in China
Source: PeerJ. 2017 Sep 15;5:e3807. doi: 10.7717/peerj.3807 (PMC5602682; doi:10.7717/peerj.3807)
Supplement: Data S1 [file peerj-05-3807-s002.xlsx]

## Sheet: Cliamte
	mean temperature (℃)	temperature range (℃)	precipitation (mm)
maiji	11.7083	10.5833	518
Taibai Moutain	13.625	9.58333	670
Huoditang	16.3333	9.16667	807
Mount Hua	6.79167	6.08333	545
Jiuzhaigou	16.5958	7.40833	921.2
Aba	3.48333	8.32	600.3
Zoige	1.92917	14.4083	648.6
Chuxiong	16.5833	11.5	861
Pingbian	17.25	7.16667	1634
Zhanyi	15.3792	10.725	985.8
Yiliang	15.625	10.5833	1001
Weining	11.5542	9.15833	890.2
Panxian	15.9583	9.58333	1375
Qianxi	14.6	7.51667	976.6
Ziyun	14.7083	6.91667	1335

## Sheet: Maiji mountain
Plant Cover	Pollen Percetage
0	14.44
4.52	39.11
4.61	11.28
5.8	44.45
10.92	28.96
16.86	40.55
18.35	35.02
22.24	59.74
26.39	36.13
28.21	41.11
30.1	46.45
40.27	75.59
44.68	61.03
51.01	39.85
65.83	86.83

## Sheet: Taibai Mountain
Plant Cover	Pollen Percetage
0	27.12
11.08	39.44
18.31	25.37
29.54	49.86
36.03	71.51
39.56	57.24
40.27	44.66
40.8	28.52
45.64	26.33
59.44	77.05
61.12	46.01
68.24	65.56
77.78	87.8
95.42	93.05
97.33	93.04

## Sheet: Huoditang
Plant Cover	Pollen Percetage
2.64	55.21
2.98	27.44
3.64	46.21
9.34	84.86
19.51	69.88
19.75	59.23
20.81	50.03
21.84	48.58
33	78.87
35.99	19.05
36.25	45.55
38.65	49.21
39.76	42.25
40.84	77.07
42.89	89.46
43.88	38
43.95	51.83
45.3	58.05
51.81	44.47
56.52	29.22
64.11	70
67.68	74.94
79.87	92.74
84.65	89.3

## Sheet: Mount Hua
Plant Cover	Pollen Percetage
0	34.68
1.57	40.08
1.91	20.09
8.85	67.36
8.99	18.25
11.9	28.73
16.29	41.33
26.02	42.15
35.63	42.36
35.82	42.24
37.81	84.88
40.24	62.77
49.89	60.32
50.03	81.81
52.46	53.27
59.06	85.91
63.73	73.82
64.29	81
65.37	65
65.96	70.36

## Sheet: Jiuzhaigou
Plant Cover	Pollen Percetage
0	22.57
4.29	32.36
18.61	35.39
23.07	22.67
23.23	78.6
24.93	63.13
36.95	75.85
37.73	51.39
49	34.91
52.81	60.07
55.64	79.43
63.4	79.78
66.63	87.5
70.96	89.32
73.37	88.17

## Sheet: Aba
0	15.29
11.68	29.84
17	70.42
Plant Cover	Pollen Percetage
21.31	35.73
22.39	43.36
30.03	36.2
31.11	59.71
32.3	78.18
32.83	29.65
33.4	63.6
34.5	57.59
35.66	53.92
46.02	31.63
47.25	67.43
61.01	73.62

## Sheet: Zoige
Plant Cover	Pollen Percetage
0	32.49
3.99	19.03
4.8	85.69
10.07	64.32
55.15	30.4
58.33	62.92
59	87.29
63.81	57.06
67.35	63.86

## Sheet: Chuxiong
Plant Cover	Pollen Percetage
0	27.07
0	48.01
2.03	34.38
3.43	13.11
3.48	41.5
9.54	50.57
9.73	36.42
14.52	6.43
20.24	66.7
21.37	69.7
23.02	68.85
24.87	88.59
32.47	72.06
32.95	30.13
36.97	64.37
44.01	68.46
47.95	56.01
48.91	84.19
53.09	87.74
57.4	82.52
63.28	74.44
64.51	89.29
65.34	80.4
65.47	66.85

## Sheet: Pingbian
Plant Cover	Pollen Percetage
0	18.05
2.31	77.16
3.24	40.62
5.45	86.64
7.37	15.66
13.6	36.24
16.84	36.16
17.08	37.61
22.08	21.04
26.76	29.06
27.72	86.68
29	73.78
33.28	44.98
34.08	62.85
36.43	94.85
36.85	79.05
38.68	37.84
47.25	39.11
51.54	59.76
52.25	46.33
53.24	72.12
53.47	68.7
55.1	54.42
66.78	88.25

[truncated: 6 more sheets: Zhanyi, Yiliang, Weining, Panxian, Qianxi, Ziyun]
